# Supplementary material for: Effects of gerbil disturbance on the ecological stoichiometric characteristics and nutrient uptake and utilization of H. ammodendron
Source: PeerJ. 2025 Apr 18;13:e19287. doi: 10.7717/peerj.19287 (PMC12011012; doi:10.7717/peerj.19287)
Supplement: Supplemental Information 1 [file peerj-13-19287-s001.xlsx]

## Sheet: Sheet1
Soil		SOC	TN	TP	TK	Soil C/N	Soil C/P	Soil N/P
Control	Youth	0.92248	0.61672	0.07263	19.6084	1.494	12.63	13.589
		0.96941	0.64322	0.07664	19.579	1.507	12.584	8.013
		1.29394	0.99235	0.07683	20.094	1.304	16.805	8.351
	Middle	1.25436	0.74004	0.07284	19.7227	1.695	17.632	10.137
		1.14273	0.53938	0.07077	19.7907	2.121	16.099	7.592
		1.23614	0.5898	0.07411	19.5411	2.095	16.703	7.923
	Adult	1.89962	2.09116	0.08158	20.2223	0.909	23.171	25.5
		1.79696	2.24014	0.08627	20.5121	0.802	20.895	26.047
		1.58364	1.79874	0.08167	19.8785	0.88	19.317	29.939
Borrowed		SOC	TN	TP	TK	Soil C/N	Soil C/P	Soil N/P
	Youth	1.392	2.485	0.075	19.725	0.566	18.56	32.773
		1.219	1.963	0.071	19.992	0.621	17.169	27.648
		1.328	1.949	0.072	19.464	0.681	18.444	27.069
	Middle	1.074	1.401	0.081	19.505	0.767	13.259	17.296
		1.265	1.016	0.073	19.572	1.245	17.329	13.918
		1.039	1.021	0.077	19.951	1.018	13.494	13.26
	Adult	0.926	3.56	0.068	19.574	0.26	13.618	52.353
		1.269	3.561	0.071	19.522	0.356	17.873	50.155
		1.09	3.484	0.067	19.425	0.313	16.269	52
Plant		SOC	TN	TP	TK	PlantC/N	PlantC/P	Plant N/P
Control	Youth	269.159	14.562	0.737	4.567	18.484	365.209	19.758
		257.944	13.978	0.889	4.757	18.454	290.151	15.723
		240	15.095	0.73	4.646	15.899	328.767	20.678
	Middle	253.846	19.114	0.897	7.108	13.28	282.994	21.309
		276.106	18.08	0.913	7.186	15.271	302.416	19.803
		300	16.764	0.962	7.805	17.895	311.85	17.426
	Adult	262.857	18.428	0.874	5.488	14.264	300.752	21.085
		271.579	17.445	0.789	5.509	15.568	344.207	22.11
		250	17.533	0.658	5.744	14.259	379.939	26.646
Borrowed	Youth	310.169	17.591	0.789	14.523	17.632	393.117	22.295
		297.71	17.524	0.802	14.93	16.989	371.209	21.85
		289.655	16.133	0.791	14.644	17.954	366.188	20.396
	Middle	263.551	21.662	0.74	11.333	12.167	356.15	29.273
		256.311	20.23	0.83	11.933	12.67	308.808	24.373
		270.27	20.669	0.762	10.675	13.076	354.685	27.125
	Adult	317.647	19.795	0.909	11.851	16.047	349.447	21.777
		258	19.282	0.665	11.286	13.38	387.97	28.995
		246.729	19.572	0.811	11.443	12.606	304.228	24.133
Biomass
		High	Basal diameter	Crown breath	Biomass(Above)	Biomass(Underground)
Youth(average)	Control	80±14.1	1±0.5	1459±246.7	54724±6539.33976	44419.8±5325.51455
	Borrowed	84±10.8	2±0.5	1414±206.7	56296.4±8866.15406	45727.8±7214.00289
Middle(average)	Control	174±10.8	3±0.5	4768±388.9	264068.6±26592.5895	214197.8±21688.23571
	Borrowed	170±11.9	3±0.5	5986±786.7	301692.8±41364.82775	244954.6±33598.48469
Adult(average)	Control	325±18.7	7±0.8	13706±393.9	1002370.2±61411.96743	813825.2±49860.15968
	Borrowed	320±12.2	7±0.8	18682±2635.5	1259745.2±130999.69043	1022788±106358.94763
ASOC/ATN/ATP/ATK
Borrowed				Control
SOC
Youth age	222.82	244.23	218.11	291.93	266.2	185.47
Middle age	245.39	202.617	260.13	202.43	241.56	242.72
Adult age	343.03	203.31	226.36	138.35	151.13	161.5
TN
Youth age	7.08	8.93	8.27	23.6	21.74	15.22
Middle age	15.56	19.91	20.24	25.83	33.54	28.41
Adult age	5.56	5.42	5.62	8.81	7.79	9.75
TP
Youth age	10.52	11.3	10.99	10.1	11.55	9.48
Middle age	9.14	11.37	9.9	12.29	12.86	13
Adult age	13.24	9.37	12.1	10.69	9.17	8.02
TK
Youth age	0.74	0.75	0.75	0.23	0.24	0.23
Middle age	0.58	0.61	0.54	0.36	0.36	0.4
Adult age	0.61	0.58	0.59	0.27	0.27	0.29
Control				Borrowed
Pn
Youth	12.33	13.81	13.07	6.43	7.54	6.99
Middle	10.7	9.77	11.63	6.36	6.83	7.43
Adult	10.33	11	9.65	6.75	7.11	7.46
PNUE
Youth	0.9	0.94	0.87	0.4	0.4	0.43
Middle	0.56	0.59	0.64	0.32	0.34	0.33
Adult	0.56	0.59	0.59	0.36	0.37	0.36
PPUE
Youth	17.73	14.7	17.9	8.86	8.72	8.84
Middle	11.93	11.72	11.12	9.28	8.28	9.02
Adult	11.82	13.09	15.7	7.82	10.69	8.77
